# Supplementary material
Source: PubMed Central journal article supplement (PMC3311367)
Supplement: 1113770109_pnas.1113770109_SI.pdf [file 1113770109_pnas.1113770109_SI.pdf]

# Supporting Information

Chang et al. 10.1073/pnas.1113770109

```
mEos2 : M-SATKEDMKIKLRMEGNVNGHHEVIDCDGIGKPFEGKQSMDLVWKEGGPLPFPADILTTA 60
mGeos-M : M-SATKEDMKIKLRMEGNVNGHHEVIDCDGIGKPFEGKQSMDLVWKEGGPLPFPADILTTA 60
Kaede : M-SLTKEDMKIKLRMEGNVNGHHEVIDCDGIGKPFEGKQSMDLVWKEGGPLPFPADILTTA 60
Dronpa : MVSVTKEDMKIKLRMEGNVNGHHEVIDCDGIGKPFEGKQSMDLVWKEGGPLPFPADILTTV 61
mKikGR : M-SVLTSEMKIKLRMEGNVNGHHEVIDCDGIGKPFEGKQSMDLVWKEGGPLPFPADILTTA 60

mEos2 : EHYGNRVFAKYPDNIQDYFKQSFPEGYSWERSLTFEDGGICTARNNDITMEGD---TFYNRV 118
mGeos-M : EHYGNRVFAKYPDNIQDYFKQSFPEGYSWERSLTFEDGGICTARNNDITMEGD---TFYNRV 118
Kaede : EHYGNRVFAKYPDHIDYFKQSFPEGYSWERSLTFEDGGICTARNNDITPLKGD---TFYNRV 118
Dronpa : EHYGNRVFAKYPDNIQDYFKQSFPEGYSWERSMNYFEDGGICTARNNDITLDGD---CYIYEI 119
mKikGR : EHYGNRVVEYEEHIDYFKQSFPEGYSWERSMSYFEDGGICTARNNDITMKKDGSNTEVNEI 121

mEos2 : RPYCTNF PANGPVMQKKTLLKWEESTEKMYVRDGVLTGDIHMALLLLEGNHYRCDERTTYKA 179
mGeos-M : RPYCTNF PANGPVMQKKTLLKWEESTEKMYVRDGVLTGDIHMALLLLEGNHYRCDERTTYKA 179
Kaede : RPDCTNF PANGPVMQKKTLLKWEESTEKMYLRDGVLTGDIHMALLLKGDVHYRCDERTTYKS 179
Dronpa : RPDCTNF PANGPVMQKRTVKKWEESTEKLYVRDGVLTGDDVNMALSLLEGGHYRCDERTTYKA 180
mKikGR : RPDCTNF PANGPVMQRKTVKKWEESTEKMYVRDGVLTGDDVNMALSLLEGGHYRCDERTTYKA 182

mEos2 : KEKGVKLPQYHFVDHCEILSHDKDYNKVKLYEHAVASGLPDNARR---- 226
mGeos-M : KEKGVKLPQYHFVDHCEILSHDKDYNKVKLYEHAVASGLPDNARR---- 226
Kaede : RQEGVKLPQYHFVDHCEILRHDKDYNKVKLYEHAVASGLPDNVK---- 225
Dronpa : R-KVVQLQEDYHFVDHCEILKSHDKDYSNVLHEHAEASSELPRQAK---- 225
mKikGR : R-KVVQLQEDYHFVDHCEILSHDKDYNKVKLYEHAVASGLPDNARR---- 232
```

Fig. S1. Sequence alignment of mEos2, mGeos-M, Kaede, Dronpa, and mKikGR. Mutations from mEos2 to mGeos-M and other mGeos are marked by a red frame. F173S (mEos2 amino acid sequence) mutants demonstrated faster off-switching kinetics, similar to those of rsFastLime (Dronpa-Val157Gly).













**Table S1. Characteristics of mEos2 His62 mutants and mEos2 His62&F173S double mutants**

|           |                     | Slow mGeos          |                        |                         |                                                             | Description of mEos2 His62 mutations       |  |
|-----------|---------------------|---------------------|------------------------|-------------------------|-------------------------------------------------------------|--------------------------------------------|--|
| H62X      | Fluorescent protein | Bleaching per cycle | Off-state fluorescence | 488 switching half-time | Normalized off-switching half-time compared with Dronpa     |                                            |  |
|           | Dronpa              | 6.10%               | 4.20%                  | 13.84                   | 100%                                                        | ps*                                        |  |
|           | PDM1-4              | 10.25%              | 10.59%                 | 36.14                   | 261%                                                        | ps                                         |  |
| A         | mGeos-A             | 4.86%               | 6.42%                  | 8.30                    | 60%                                                         | ps                                         |  |
| C         | mGeos-C             | 11.52%              | 5.02%                  | 23.91                   | 173%                                                        | ps                                         |  |
| D         | mGeos-D             | —                   | —                      | —                       | —                                                           | No fluorescence                            |  |
| E         | mGeos-E             | 4.94%               | 3.17%                  | 6.61                    | 48%                                                         | ps                                         |  |
| F         | mGeos-F             | 11.63%              | 7.19%                  | 52.28                   | 378%                                                        | ps                                         |  |
| G         | mGeos-G             | 7.76%               | 7.11%                  | 12.76                   | 92%                                                         | ps                                         |  |
| H         | mEos2               | —                   | —                      | —                       | —                                                           | pc <sup>†</sup>                            |  |
| I         | mGeos-I             | 2.54%               | 4.81%                  | 4.57                    | 33%                                                         | ps                                         |  |
| K         | mGeos-K             | 9.66%               | 5.07%                  | 29.52                   | 213%                                                        | ps                                         |  |
| L         | mGeos-L             | 5.28%               | 1.90%                  | 7.43                    | 54%                                                         | ps                                         |  |
| M         | mGeos-M             | 6.38%               | 6.28%                  | 21.03                   | 152%                                                        | ps                                         |  |
| N         | mGeos-N             | 7.10%               | 3.07%                  | 23.33                   | 169%                                                        | ps                                         |  |
| P         | mGeos-P             | —                   | —                      | —                       | —                                                           | No fluorescence                            |  |
| Q         | mGeos-Q             | 4.60%               | 2.59%                  | 8.83                    | 64%                                                         | ps                                         |  |
| R         | mGeos-R             | —                   | —                      | —                       | —                                                           | No fluorescence                            |  |
| S         | mGeos-S             | 6.97%               | 5.94%                  | 15.65                   | 113%                                                        | ps                                         |  |
| T         | mGeos-T             | 4.01%               | 2.30%                  | 7.95                    | 57%                                                         | ps                                         |  |
| V         | mGeos-V             | 2.94%               | 4.25%                  | 3.75                    | 27%                                                         | ps                                         |  |
| W         | mGeos-W             | —                   | —                      | —                       | —                                                           | No fluorescence                            |  |
| Y         | mGeos-Y             | —                   | —                      | —                       | —                                                           | No fluorescence                            |  |
|           |                     | Fast mGeos          |                        |                         |                                                             | Description of mEos2 His62&F173S mutations |  |
| H62XF173S | Fluorescent protein | Bleaching per cycle | Off-state fluorescence | 488 switching half-time | Normalized off-switching half-time compared with rsFastLime |                                            |  |
|           | rsFastLime          | 2.79%               | 3.10%                  | 14.83                   | 100%                                                        | ps                                         |  |
| CS        | mGeos-CS            | 3.27%               | 2.54%                  | 7.24                    | 49%                                                         | ps                                         |  |
| ES        | mGeos-ES            | 1.26%               | 3.05%                  | 4.96                    | 33%                                                         | ps                                         |  |
| FS        | mGeos-FS            | 3.75%               | 2.80%                  | 13.32                   | 90%                                                         | ps                                         |  |
| LS        | mGeos-LS            | 2.60%               | 3.13%                  | 6.48                    | 44%                                                         | ps                                         |  |
| MS        | mGeos-MS            | 2.56%               | 1.91%                  | 8.00                    | 54%                                                         | ps                                         |  |
| SS        | mGeos-SS            | 3.23%               | 4.45%                  | 11.80                   | 80%                                                         | ps                                         |  |

\*ps means photoswitchable;

<sup>†</sup>pc means photoconversion.

**Table S2. Photon statistics for purified mGeos in vitro and  $\beta$ -actin linked mGeos in HeLa cells**

|                             |         | Total photon burst per molecule |          |          | Background photon per molecule |        |
|-----------------------------|---------|---------------------------------|----------|----------|--------------------------------|--------|
|                             |         | <i>n</i>                        | Mean     | Median   | Mean                           | Median |
| Purified mGeos*             | mGeos-F | 186,186                         | 572.9071 | 450.4789 | 3.8630                         | 3.6335 |
|                             | mGeos-C | 381,035                         | 539.1392 | 466.0933 | 3.9077                         | 3.6663 |
|                             | mGeos-M | 334,956                         | 590.3668 | 491.9605 | 4.3183                         | 3.9852 |
|                             | mGeos-S | 269,545                         | 477.0508 | 415.0571 | 3.5798                         | 3.3514 |
|                             | mGeos-E | 630,198                         | 460.7853 | 425.9008 | 4.0704                         | 3.9058 |
|                             | mGeos-L | 552,559                         | 424.9025 | 388.1176 | 3.7294                         | 3.5689 |
| $\beta$ -actin linked mGeos | mGeos-F | 1,642,556                       | 375.497  | 282.49   | 5.4088                         | 5.2202 |
|                             | mGeos-C | 1,465,352                       | 309.1058 | 255.242  | 5.0235                         | 4.8154 |
|                             | mGeos-M | 1,878,091                       | 459.0682 | 361.7952 | 6.8841                         | 6.3330 |
|                             | mGeos-S | 2,514,005                       | 396.8448 | 327.1493 | 6.2131                         | 5.8846 |
|                             | Dronpa  | 1,880,667                       | 270.2028 | 227.8501 | 4.4372                         | 4.2501 |
|                             | PDM1-4  | 1,036,338                       | 341.9071 | 294.4645 | 5.6584                         | 5.4320 |
|                             | mGeos-N | 2,453,143                       | 334.6510 | 283.9575 | 5.3985                         | 5.1416 |
|                             | mGeos-K | 1,507,560                       | 345.8167 | 288.3660 | 5.6158                         | 5.4464 |

\*buffer condition: PBS (pH = 7.4).
